# Supplementary material for: Repeated Syphilis Episodes in HIV-Infected Men Who Have Sex With Men: A Multicenter Prospective Cohort Study on Risk Factors and the Potential Role of Syphilis Immunity
Source: PubMed Central journal article supplement — Open Forum Infect Dis. 2020 Jan 12;7(1):ofaa019. doi: 10.1093/ofid/ofaa019 (PMC6988838; doi:10.1093/ofid/ofaa019), 2020-01-12

## SUPPLEMENTARY WEBAPPENDIX

**Appendix Figure 1: Risk factors for repeated syphilis episodes in HIV-infected men who have sex with men (sensitivity analysis; Andersen-Gill model estimates; including recreational drug use and alcohol consumption)**

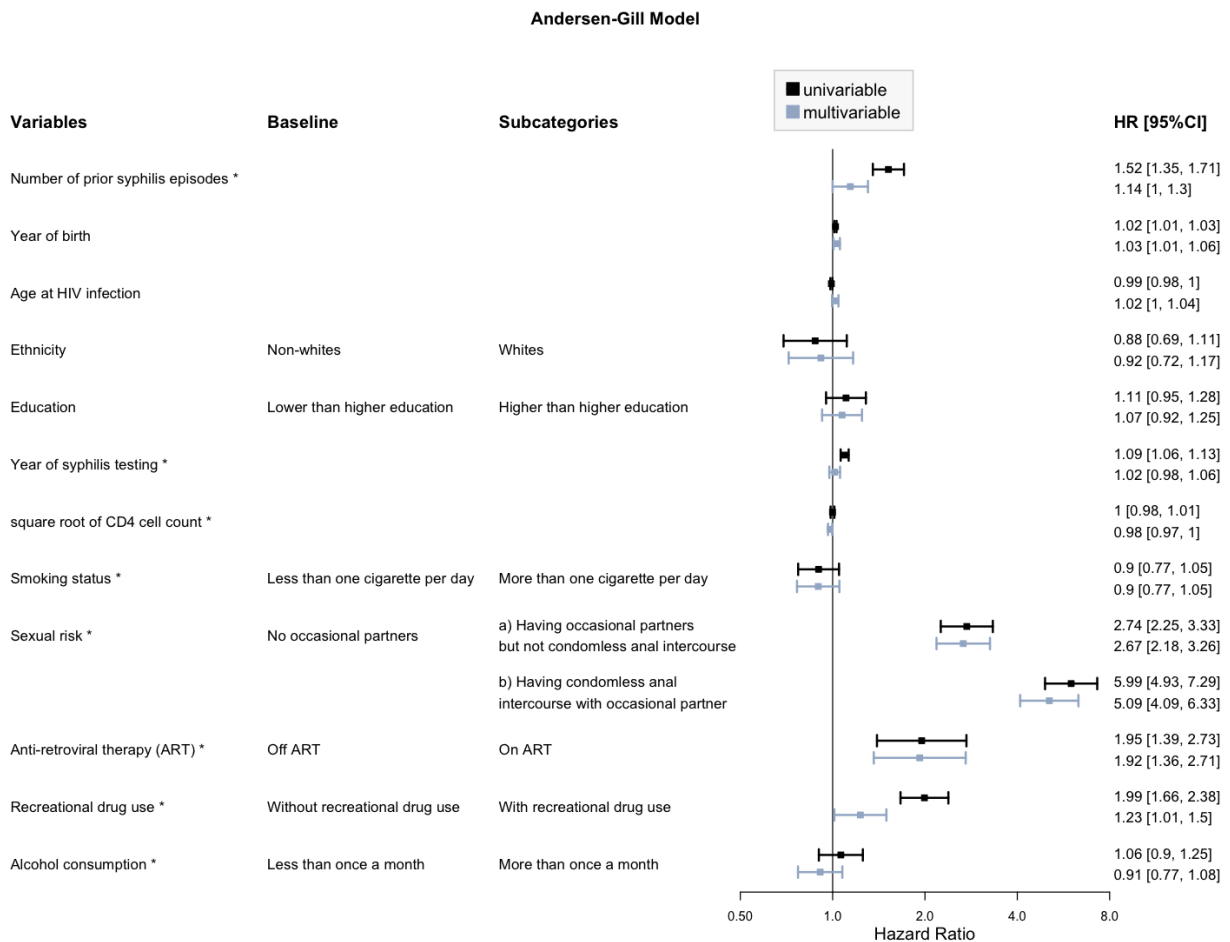

Abbreviations: ART, antiretroviral therapy; CD4, cluster of differentiation 4; CI, confidence interval; HR, hazard ratio.

Note: All effect estimates are expressed per one-unit increase if no categories are stated. Variables with an asterisk (\*) are time-updated.

**Appendix Figure 2: Risk factors for repeated syphilis episodes in HIV-infected men who have sex with men (sensitivity analysis; marginal-mean model estimates)**

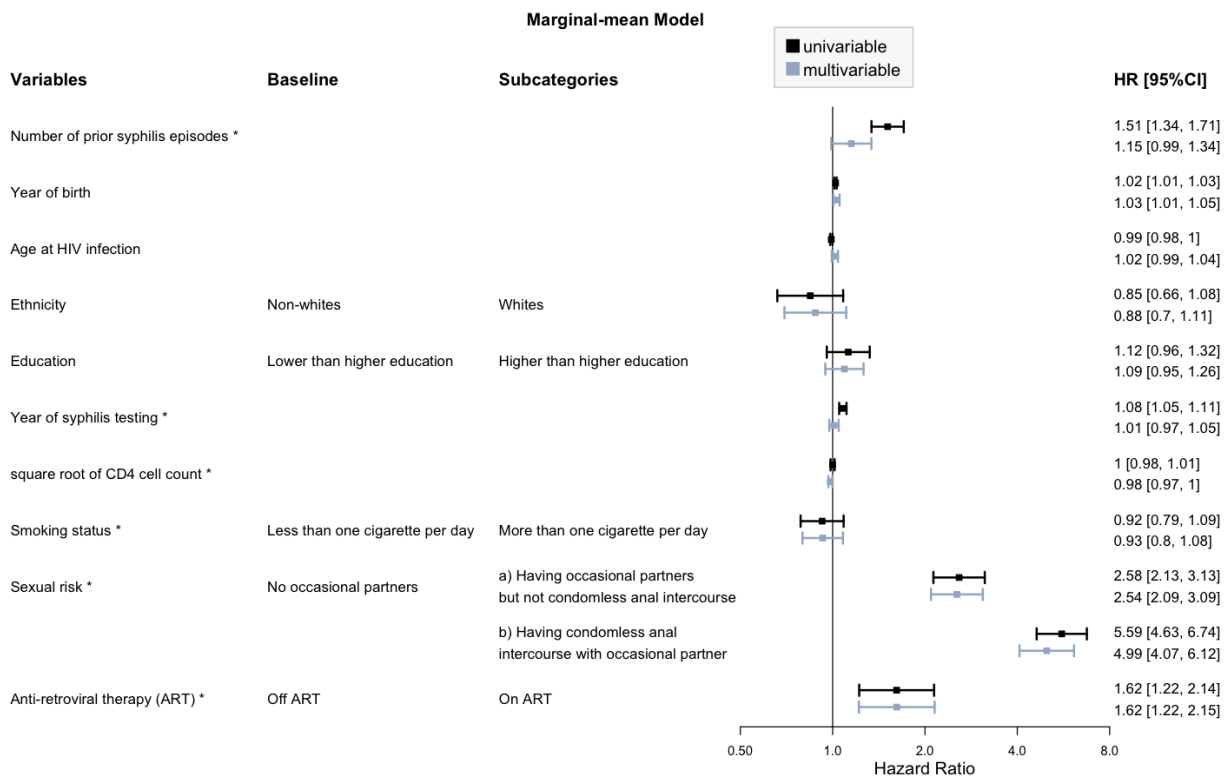

Abbreviations: ART, antiretroviral therapy; CD4, cluster of differentiation 4; CI, confidence interval; HR, hazard ratio.

Note: All effect estimates are expressed per one-unit increase if no categories are stated. Variables with an asterisk (\*) are time-updated.

### Appendix Figure 3: Schoenfeld residuals

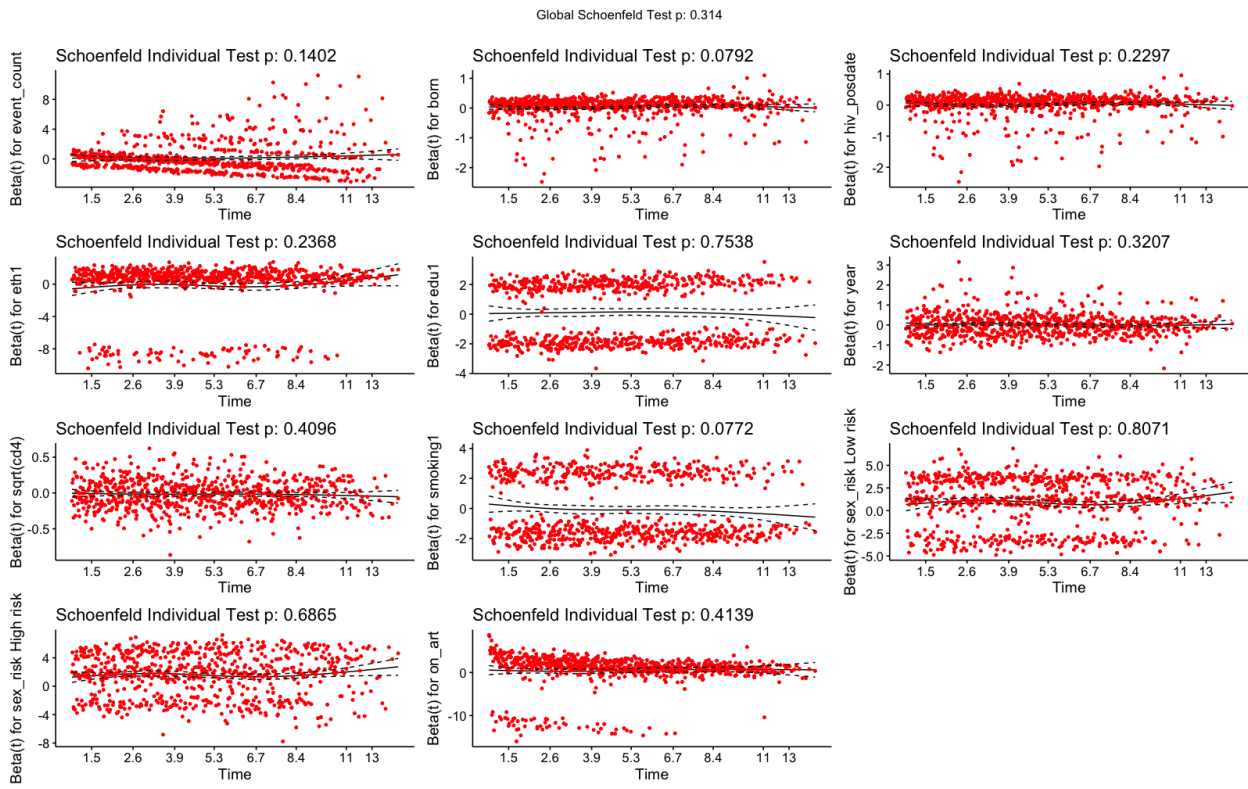

Appendix Figure 4: Deviance residuals

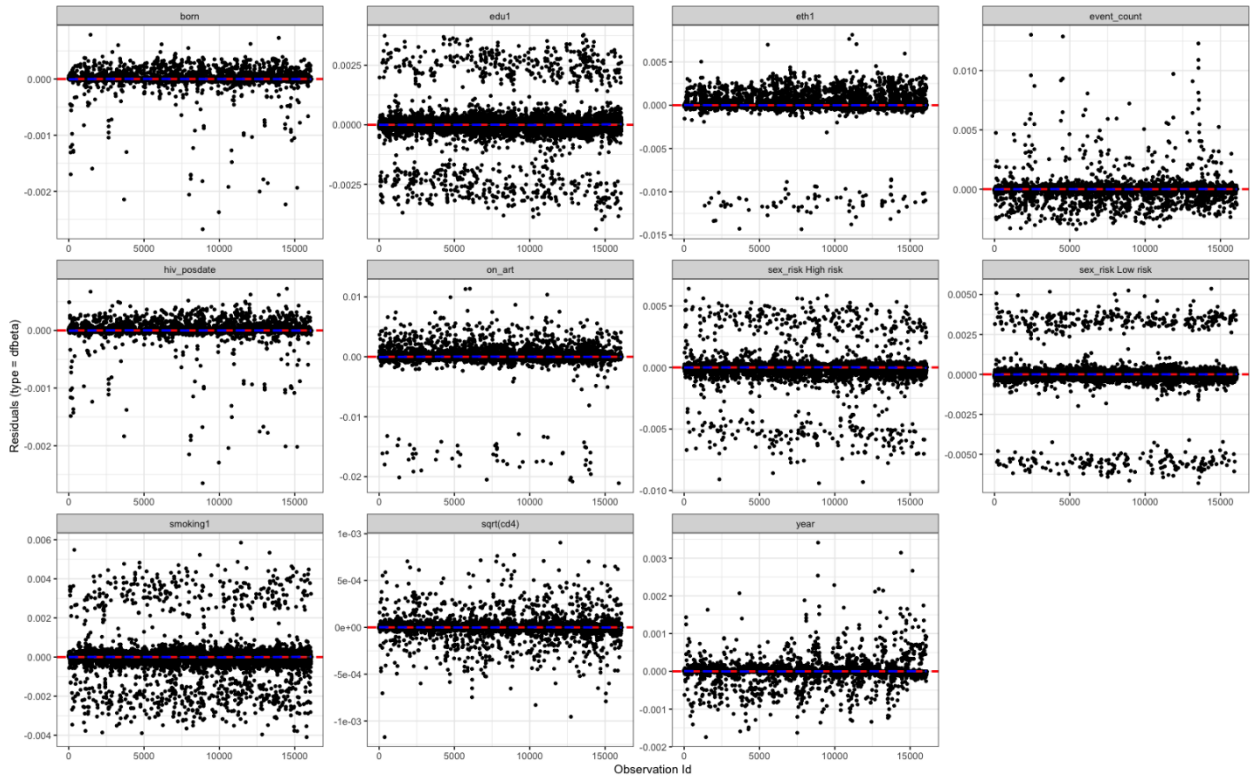

**Appendix Figure 5: Syphilis test trends over time in HIV-infected men who have sex with men: a) proportion of individuals with  $\geq 1$  syphilis test per calendar year (“coverage”); b) mean frequency of syphilis tests per individual and calendar year**

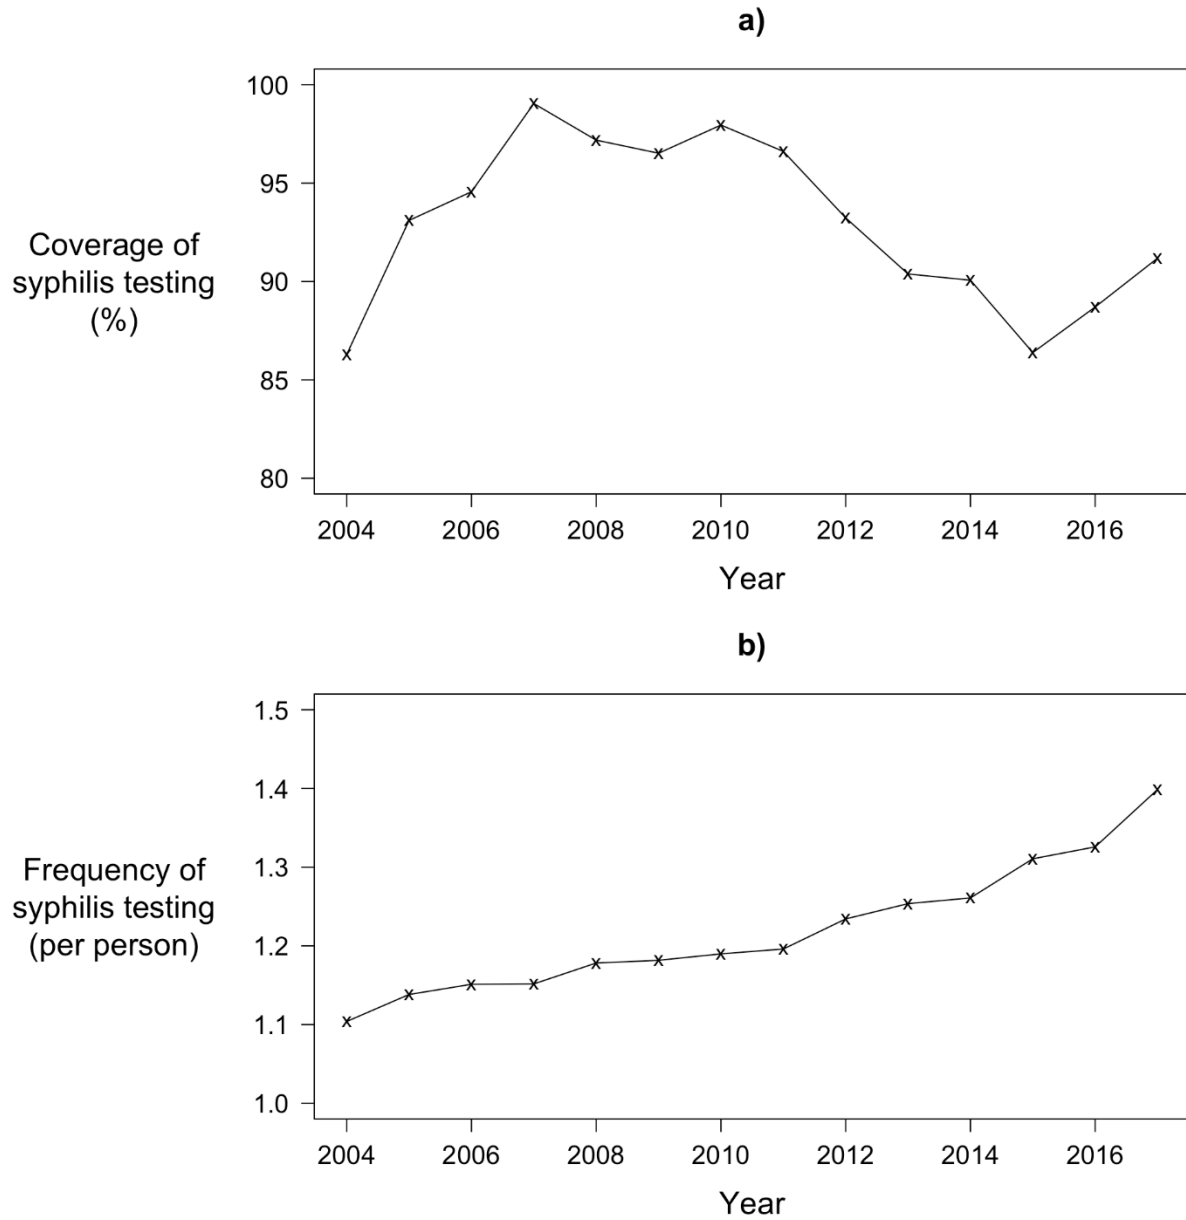

Supplement: ofaa019_suppl_supplementary_figures.pdf [file ofaa019_suppl_supplementary_figures.pdf]
